# The Role of ACT-Like Subdomain in Bacterial Threonine Dehydratases

Xuefei Yu<sup>1,2</sup>, Yanyan Li<sup>2</sup>, Xiaoyuan Wang<sup>1,3\*</sup>

**1** State Key Laboratory of Food Science and Technology, Jiangnan University, Wuxi, China, **2** Key Laboratory of Industrial Biotechnology of Ministry of Education, School of Biotechnology, Jiangnan University, Wuxi, China, **3** Synergetic Innovation Center of Food Safety and Nutrition, Jiangnan University, Wuxi, China

## Abstract

In bacteria, threonine dehydratases could convert L-threonine to 2-ketobutyrate. Some threonine dehydratases contain only a catalytic domain, while others contain an N-terminal catalytic domain and a C-terminal regulatory domain composed of one or two ACT-like subdomains. However, the role of the ACT-like subdomain in threonine dehydratases is not clear. Here, nine different bacterial threonine dehydratases were studied. Three of the nine contain no ACT-like subdomain, four of them contain a single ACT-like subdomain, and two of them contain two ACT-like subdomains. The nine genes encoding these threonine dehydratases were individually overexpressed in *E. coli* BL21(DE3), and the enzymes were purified to homogeneity. Activities of the purified enzymes were analyzed after incubation at different temperatures and different pHs. The results showed that threonine dehydratases with a single ACT-like subdomain are more stable at higher temperatures and a broad range of pH than those without ACT-like subdomain or with two ACT-like subdomains. Furthermore, the specific activity of threonine dehydratases increases with the increase of the number of ACT-like subdomains they contain. The results suggest that the ACT-like subdomain plays an important role in bacterial threonine dehydratases.

**Citation:** Yu X, Li Y, Wang X (2014) The Role of ACT-Like Subdomain in Bacterial Threonine Dehydratases. PLoS ONE 9(1): e87550. doi:10.1371/journal.pone.0087550

**Editor:** Matthew A. Perugini, La Trobe University, Australia

**Received:** September 20, 2013; **Accepted:** December 20, 2013; **Published:** January 24, 2014

**Copyright:** © 2014 Yu et al. This is an open-access article distributed under the terms of the Creative Commons Attribution License, which permits unrestricted use, distribution, and reproduction in any medium, provided the original author and source are credited.

**Funding:** This project was financially supported by grants from National Key Basic Research Program of China (2012CB725202). The funders had no role in study design, data collection and analysis, decision to publish, or preparation of the manuscript.

**Competing Interests:** The authors have declared that no competing interests exist.

\* E-mail: xiaoyuanwang@hotmail.com

## Introduction

Bacterial threonine dehydratase (TD) converts L-threonine to 2-ketobutyrate. There are usually two types of TD: biosynthetic threonine dehydratase (BTD) and catabolic threonine dehydratase (CTD) (Fig. 1). BTD functions in the biosynthetic pathway of L-isoleucine when bacteria grow under aerobic conditions, and usually contains an N-terminal catalytic domain and a C-terminal regulatory domain. CTD contains only the catalytic domain, and plays a role in the degradation of L-threonine to propionate when bacteria grow under anaerobic conditions [1], its activity is activated by AMP and CMP [2].

ACT (named after the first letters of three proteins, Aspartate kinase, Chorismate mutase and TyrA) is a structural motif in proteins that function in the control of metabolism, solute transport, and signal transduction [3]. BTD encoded by the gene *ilvA* in *Escherichia coli* contains two ACT-like subdomains in its C-terminal regulatory domain. The activity of the enzyme is inhibited by the end product L-isoleucine but activated by L-valine, the product of a competing biosynthetic pathway [4]. BTD encoded by *ilvA* in *Bacillus subtilis*, however, contains only one ACT-like subdomain in its C-terminal regulatory domain, and is inhibited by L-isoleucine or by high concentrations of L-valine [5]. The interaction between different domains may facilitate enzyme folding and increase stability [6]. Since BTD is a key enzyme for improving L-isoleucine production in bacterial fermentation [7-9], it is necessary to investigate the role of the ACT-like subdomain in the enzyme.

In this study, nine TDs containing different numbers of ACT-like subdomains were chosen from six different bacterial strains. The nine genes encoding these TDs were individually overexpressed in *E. coli*, and activities of the purified enzymes were analyzed after they were incubated at different temperatures and different pHs. The results indicate that the ACT-like subdomain plays an important role in the activity of TDs in bacteria.

## Materials and Methods

### Bacterial strains, plasmids and DNA manipulation

All bacterial strains and plasmids used in this study are listed in Table 1. *E. coli* JM109 was used for constructing plasmids, while *E. coli* BL21 (DE3) was used for expressing TD enzymes. Plasmid pET28a was selected as the vector for protein expression. All *E. coli* cells were grown at 37°C in LB media (1% peptone, 0.5% yeast extract, 0.5% NaCl).

All the primers used for the PCR amplifications are listed in Table 2. *CgtdeB* was amplified from the genomic DNA of *C. glutamicum*, using the primer pair of CgCTD-F and CgCTD-R; *EctdeB* was amplified from the genomic DNA of *E. coli*, using the primer pair of EcCTD-F and EcCTD-R; *SatdeB* was amplified from the genomic DNA of *S. aureus*, using the primer pair of SaCTD-F and SaCTD-R; *CgilvA* was amplified from the genomic DNA of *C. glutamicum*, using the primer pair of CgBTD1-F and CgBTD1-R; *SailvA* was amplified from the genomic DNA of *S. aureus*, using the primer pair of SaBTD1-F and SaBTD1-R; *SgilvA* was amplified from the genomic DNA of *S. griseus*, using the primer

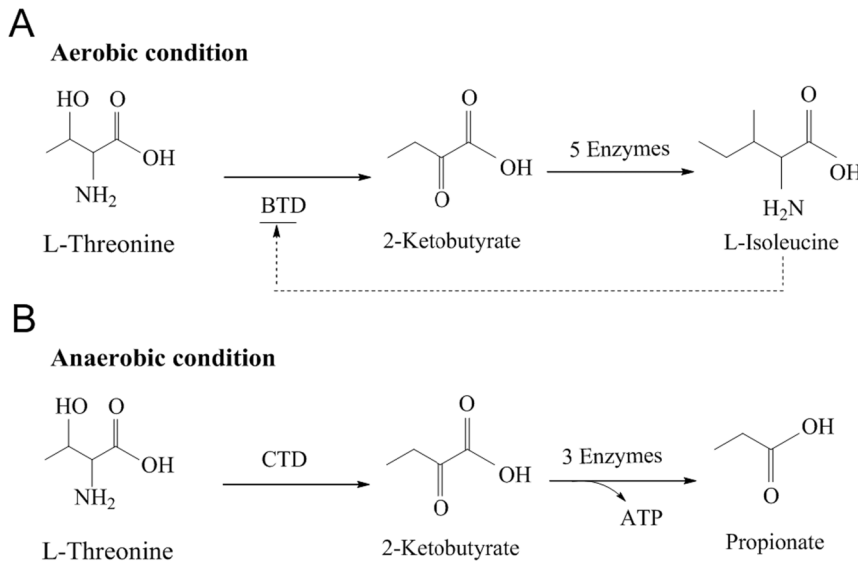

**Figure 1. The two different pathways BTD and CTD involved in bacteria.** A. BTD catalyzes the first reaction in the biosynthesis of L-isoleucine in bacteria under aerobic conditions. BTD is feedback inhibited by L-isoleucine. B. CTD degrades L-threonine to propionate in bacteria under anaerobic conditions to generate ATP. CTD is activated by AMP and CMP.  
doi:10.1371/journal.pone.0087550.g001

**Table 1. Bacterial strains and plasmids used in this work.**

| Strain or plasmid       | Description                                | Sources    |
|-------------------------|--------------------------------------------|------------|
| <b>Strains</b>          |                                            |            |
| JM109                   | Wide type <i>E. coli</i>                   | Stratagene |
| BL21(DE3)               | <i>E. coli</i> for protein expression      | Stratagene |
| W3110                   | <i>E. coli</i> W3110                       | Stratagene |
| ATCC 13032              | <i>C. glutamicum</i>                       | ATCC       |
| Mu50                    | <i>Staphylococcus aureus</i>               | Stratagene |
| NBRC 13350              | <i>Streptomyces griseus</i>                | Stratagene |
| str. 168                | <i>Bacillus subtilis</i>                   | Stratagene |
| KT2440                  | <i>Pseudomonas putida</i>                  | Stratagene |
| BL21(DE3)/pET28a-CgtdcB | BL21(DE3) harboring pET28a-CgtdcB          | This work  |
| BL21(DE3)/pET28a-EctdcB | BL21(DE3) harboring pET28a-EctdcB          | This work  |
| BL21(DE3)/pET28a-SatdcB | BL21(DE3) harboring pET28a-SatdcB          | This work  |
| BL21(DE3)/pET28a-CgilvA | BL21(DE3) harboring pET28a-CgilvA          | This work  |
| BL21(DE3)/pET28a-SailvA | BL21(DE3) harboring pET28a-SailvA          | This work  |
| BL21(DE3)/pET28a-SgilvA | BL21(DE3) harboring pET28a-SgilvA          | This work  |
| BL21(DE3)/pET28a-BsilvA | BL21(DE3) harboring pET28a-BsilvA          | This work  |
| BL21(DE3)/pET28a-EcilvA | BL21(DE3) harboring pET28a-EcilvA          | This work  |
| BL21(DE3)/pET28a-PpilvA | BL21(DE3) harboring pET28a-PpilvA          | This work  |
| <b>Plasmids</b>         |                                            |            |
| pET28a                  | Expression vector in <i>E. coli</i>        |            |
| pET28a-CgtdcB           | pET28a harboring <i>C. glutamicum</i> tdcB | This work  |
| pET28a-EctdcB           | pET28a harboring <i>E. coli</i> tdcB       | This work  |
| pET28a-SatdcB           | pET28a harboring <i>S. aureus</i> tdcB     | This work  |
| pET28a-CgilvA           | pET28a harboring <i>C. glutamicum</i> ilvA | This work  |
| pET28a-SailvA           | pET28a harboring <i>S. aureus</i> ilvA     | This work  |
| pET28a-SgilvA           | pET28a harboring <i>S. griseus</i> ilvA    | This work  |
| pET28a-BsilvA           | pET28a harboring <i>B. subtilis</i> ilvA   | This work  |
| pET28a-EcilvA           | pET28a harboring <i>E. coli</i> ilvA       | This work  |
| pET28a-PpilvA           | pET28a harboring <i>P. putida</i> ilvA     | This work  |

doi:10.1371/journal.pone.0087550.t001

pair of SgBTD1-F and SgBTD1-R; *BsilvA* was amplified from the genomic DNA of *B. subtilis*, using the primer pair of BsBTD1-F and BsBTD1-R; *EcilvA* was amplified from the genomic DNA of *E. coli*, using the primer pair of EcBTD2-F and EcBTD2-R; *PpilvA* was amplified from the genomic DNA of *P. putida*, using the primer pair of PpBTD2-F and PpBTD2-R. All PCR amplifications were carried out in a 50  $\mu$ L reaction mixture containing 5  $\mu$ L 10 $\times$  Extaq buffer, 4  $\mu$ L dNTP mixture (2.5 mM each), 1  $\mu$ L template DNA, 1  $\mu$ L forward primer (20  $\mu$ M), 1  $\mu$ L reverse primer (20  $\mu$ M) and 0.5  $\mu$ L Extaq. The PCR product was digested by restriction enzymes, ligated into pET28a which was similarly digested, transformed into *E. coli* JM109 and selected on LB plates containing 50  $\mu$ g/ml kanamycin. The correct recombinant plasmids were then purified and transformed into *E. coli* BL21(DE3), resulting in nine *E. coli* strains: BL21(DE3)/pET28a-CgtdcB, BL21(DE3)/pET28a-EctdcB, BL21(DE3)/pET28a-SatdcB, BL21(DE3)/pET28a-CgilvA, BL21(DE3)/pET28a-SailvA, BL21(DE3)/pET28a-SgilvA, BL21(DE3)/pET28a-BsilvA, BL21(DE3)/pET28a-EcilvA and BL21(DE3)/pET28a-PpilvA.

#### Expression and purification of nine different TD enzymes

TD enzymes CgCTD, EcCTD, SaCTD, CgBTD1, SaBTD1, SgBTD1, BsBTD1, EcBTD2 and PpBTD2 were purified from *E. coli* BL21(DE3)/pET28a-CgtdcB, BL21(DE3)/pET28a-EctdcB, BL21(DE3)/pET28a-SatdcB, BL21(DE3)/pET28a-CgilvA, BL21(DE3)/pET28a-SailvA, BL21(DE3)/pET28a-SgilvA, BL21(DE3)/pET28a-BsilvA, BL21(DE3)/pET28a-EcilvA and BL21(DE3)/pET28a-PpilvA, respectively. Each strain was grown in LB media at 25°C. Isopropyl- $\beta$ -D-thiogalactopyranoside was added to a final concentration of 0.5 mM when OD<sub>600</sub> of the cells reached 0.6. The cells were further grown for 10 h and harvested by centrifugation at 3750 $\times$ g for 20 min. The cell pellets were resuspended in the binding buffer (20 mM HEPES, 500 mM NaCl, 20 mM imidazole, pH 8.0), and disrupted by an ultrasonic disintegrator in an icy bath for 15 min. Cell debris was removed by centrifugation at 13000 $\times$ g for 20 min, and the crude extracts were used for TD purification with a Ni-NTA Sepharose column (QIAGEN). The column was firstly washed with 10 volumes of the binding buffer, applied the crude extracts, washed again with 10 volumes of the binding buffer, and then the TD enzyme was eluted with 5 volumes of the elution buffer (20 mM HEPES, 500 mM NaCl,

**Table 2.** The primers used for the PCR amplifications in this work.

| Primers  | Sequences(5'-3')                     | Restriction site |
|----------|--------------------------------------|------------------|
| CgCTD-F  | CCGGAATTCATGCTCACCTCAACGATGTC        | EcoRI            |
| CgCTD-R  | CCCAAGCTTTCACAGTGTGTGAGGTCAGT        | HindIII          |
| EcCTD-F  | CCGGAATTCATGCATATTACATACGATCTGCC     | EcoRI            |
| EcCTD-R  | CCCAAGCTTTTAAGCGTCAACGAAACCGGT       | HindIII          |
| SaCTD-F  | CCGAATTCATGACAACCAACACAGTTACAT       | EcoRI            |
| SaCTD-R  | CCGCTCGAGTTAACCTACCACACCTTACTT       | XhoI             |
| CgBTD1-F | GGAATTCATATGAGTGAACATACGTGTCTGAG     | NdeI             |
| CgBTD1-R | CGGGATCCTTAGGTCAAGTATTCGTACTCAG      | BamHI            |
| SaBTD1-F | CCGAATTCATGACAGTCAAAACAACAGTT        | EcoRI            |
| SaBTD1-R | CCGCTCGAGTTAGATTAACAATGAATATAACATCTT | XhoI             |
| SgBTD1-F | CATGCCATGGTGAGCTCCGCGGACCG           | NcoI             |
| SgBTD1-R | CCGCTCGAGGCCATCACCCGGAAGCC           | XhoI             |
| BsBTD1-F | CCGAATTCATGAAACCGTTGCTTAAAGAA        | EcoRI            |
| BsBTD1-R | CCGCTCGAGTTAGATTAGCAAATGGAACAAG      | XhoI             |
| EcBTD2-F | CCCGGATCCATGGCTGACTCGCAACCCCT        | BamHI            |
| EcBTD2-R | CCGCTCGAGCTAACCCGCCAAAAAGAACCT       | XhoI             |
| PpBTD2-F | CGGGATCCTAGTCTGAACAGTACGTCAG         | BamHI            |
| PpBTD2-R | CCACTCGAGTCAGCCAGGAACAGTTTGT         | XhoI             |

The recognition sites for restriction enzymes are underlined.  
doi:10.1371/journal.pone.0087550.t002

500 mM imidazole, pH 8.0). The purified TD enzymes were stored at 4°C in the elution buffer. Protein concentration was determined using the Bradford method [10]. The expression level and purity of the enzymes were analyzed by using 12% SDS-PAGE.

**Activity assays of TD enzymes at different temperatures and pH**

Enzyme activities of the purified TD enzymes were measured according to the published method [11]. The 1 mL reaction

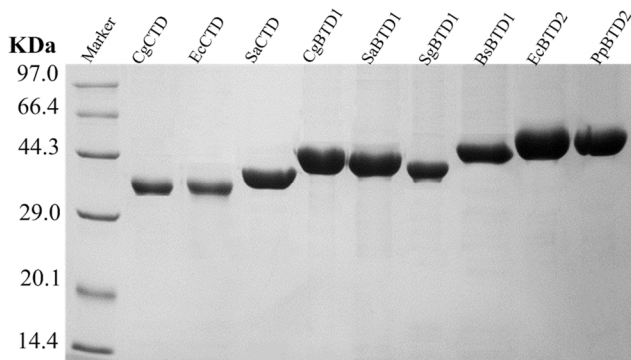

**Figure 2. SDS-PAGE of the nine purified TDs.** Lane M, molecular mass marker; lane 1, CgCTD purified from BL21(DE3)/pET28a-CgtdcB; lane 2, EcCTD purified from BL21(DE3)/pET28a-EctdcB; lane 3, SaCTD purified from BL21(DE3)/pET28a-SatdcB; lane 4, CgBTD1 purified from BL21(DE3)/pET28a-CgilvA; lane 5, SaBTD1 purified from BL21(DE3)/pET28a-SailvA; lane 6, SgBTD1 purified from BL21(DE3)/pET28a-SgilvA; lane 7, BsBTD1 purified from BL21(DE3)/pET28a-BsilvA; lane 8, EcBTD2 purified from BL21(DE3)/pET28a-EcilvA; lane 9, PpBTD2 purified from BL21(DE3)/pET28a-PpilvA.  
doi:10.1371/journal.pone.0087550.g002

**Table 3.** Information of TDs from different bacteria.

| Enzyme | GI           | Strain source        | ACT numbers | MW (kDa) |
|--------|--------------|----------------------|-------------|----------|
| CgCTD  | gi 19552203  | <i>C. glutamicum</i> | 0           | 32.0     |
| EcCTD  | gi 388479115 | <i>E. coli</i>       | 0           | 35.2     |
| SaCTD  | gi 15924428  | <i>S. aureus</i>     | 0           | 37.1     |
| CgBTD1 | gi 23308897  | <i>C. glutamicum</i> | 1           | 46.5     |
| SaBTD1 | gi 282917408 | <i>S. aureus</i>     | 1           | 46.9     |
| SgBTD1 | gi 182436361 | <i>S. griseus</i>    | 1           | 42.6     |
| BsBTD1 | gi 16079236  | <i>B. subtilis</i>   | 1           | 46.6     |
| EcBTD2 | gi 388479474 | <i>E. coli</i>       | 2           | 56.1     |
| PpBTD2 | gi 26991825  | <i>P. putida</i>     | 2           | 54.9     |

doi:10.1371/journal.pone.0087550.t003

mixture contains 100 mM potassium phosphate buffer, pH 8.0, 40 mM threonine, 1 mM pyridoxal phosphate and 2 µg enzymes. The reaction was started by adding L-threonine, incubated at 22°C for 15 min, and then terminated by adding 1 mL stopping solution (1% semicarbazide and 0.9% sodium acetate). The amount of 2-ketobutyrate in the reaction mixture was determined by measuring the absorption at 254 nm ( $\epsilon = 0.52$  mmol/cm) using a UV/Vis spectrophotometer. One unit activity was defined as the enzyme amount required for the formation of 1 mole 2-ketobutyrate per minute at 22°C, and the specific activity was defined as the total activity per mg protein.

To measure the activity at different temperatures, the purified enzymes were incubated at the specific temperature for 10 min, and then cooled on ice. The  $T_{50}$  values were measured as described in the published method [11].

To analyze the enzyme activity at different pH, the purified enzyme was first diluted 10 times in acetic acid/sodium acetate buffer (pH 5), phosphate buffer (pH 6–8), or glycine sodium hydroxide buffer (pH 9–11), and incubated on ice for 30 min, before assaying the enzyme activity in 100 mM potassium phosphate buffer (pH 8.0).

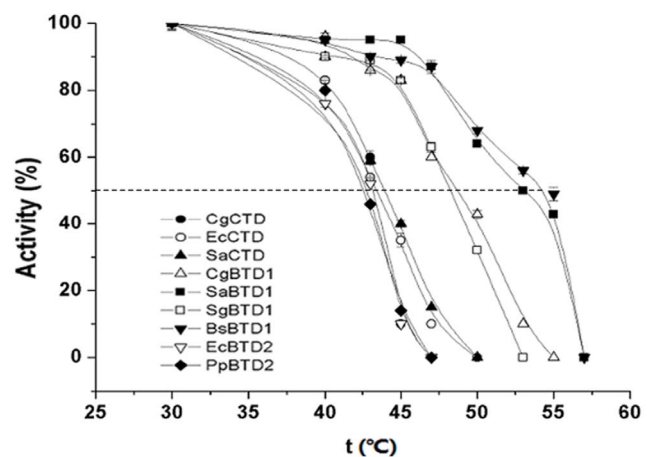

**Figure 3. The effect of temperature on the activity of nine different TDs.** Error bars indicate the standard deviations from three parallel samples.  
doi:10.1371/journal.pone.0087550.g003

**Table 4.** Stability of TDs from different bacteria.

| Enzyme                   | CgCTD | EcCTD | SaCTD | CgBTD1 | SaBTD1 | SgBTD1 | BsBTD1 | EcBTD2 | PpBTD2 |
|--------------------------|-------|-------|-------|--------|--------|--------|--------|--------|--------|
| $T_{50}$ (°C)            | 43    | 43    | 43    | 47     | 53     | 47     | 55     | 43     | 43     |
| Specific Activity (U/mg) | 8.5   | 9.9   | 1.47  | 89     | 7.4    | 1.0    | 23     | 171    | 106    |

doi:10.1371/journal.pone.0087550.t004

## Results and Discussion

In order to investigate the role of ACT-like subdomains in TD enzymes of bacteria, nine genes encoding TD enzymes in different bacteria were cloned in pET28a and overexpressed in *E. coli*. According to the analysis of CDART (Conserved Domain Architecture Retrieval Tool) [12], CgCTD, EcCTD and SaCTD contain no ACT-like subdomain; CgBTD1, SaBTD1, SgBTD1 and BsBTD1 all contain a single ACT-like subdomain; while EcBTD2 and PpBTD2 both contain two ACT-like subdomains (Table 3). The size of the protein increases with the increase of the number of ACT-like subdomains it contains. Nine TD enzymes were overexpressed in *E. coli* and purified to homogeneity. The purity of the proteins was confirmed by SDS-PAGE analysis (Fig. 2). The migrating rates of the nine enzymes in the gel are consistent well with their theoretical size (Table 1).

The activity of each TD enzymes was analyzed after the enzyme was incubated for 10 min at 30, 40, 43, 45, 47, 50, 53, 55, 57 and 60°C, respectively (Fig. 3). The activities of EcBTD2 and PpBTD2 significantly decreased with the increase of temperature, and their activities were totally lost when incubating at 47°C for 10 min. The activity loss of CgCTD, EcCTD and SaCTD showed the similar level to that of EcBTD2 and PpBTD2; the activities of CgBTD1, SaBTD1, SgBTD1 and BsBTD1, however, decreased much slower than that of EcBTD2 and PpBTD2 with the increase of temperature. The  $T_{50}$  value was around 43°C for CgCTD, EcCTD, SaCTD, EcBTD2 and PpBTD2, but ranged between 47-55°C for CgBTD1, SaBTD1, SgBTD1 and BsBTD1 (Table 4). These data reveal that at higher temperatures BTD1 is usually

more stable than CTD and BTD2, suggesting that the TD enzyme containing a single ACT-like subdomain is more stable at higher temperatures.

The specific activity at 30°C for each TD enzyme was also determined (Table 4). The highest specific activity for CTD, BTD1 and BTD2 was 9.9, 89 and 171 U/mg, respectively, suggesting that ACT-like subdomains could increase the specific activity of TD enzyme. Interestingly, though the BTD2 has one more ACT-like subdomain, its stability at higher temperatures is lower than that of BTD1 and equal to that of CTDs. Except for the higher specific activity, structural flexibility might be another benefit of TDs containing multiple ACT-like subdomains such as BTD2. The mechanical flexibility is critical for the function of proteins [13], and may be a promoter for generating BTD2 to adapt bacteria for the more complex environment [14,15].

The activities of the nine TD enzymes were also analyzed after incubation for 30 min in buffers with different pH. For all nine TDs, the remaining activity after incubating at pH 8.0 was maximal and that incubation at various other pH values prior to assaying at pH 8.0 affected the activities of the TDs in the manner shown in Fig. 4. After incubation at pH ranges from 5 to 11, the remaining activities of CgBTD1, SaBTD1, SgBTD1 and BsBTD1 were more than 60%, and were higher than those of CgCTD, EcCTD, SaCTD, EcBTD2 and PpBTD2. After incubation at pH range from 6 to 9, all the nine TD enzymes maintained more than 50% of their activities. These data reveal that BTD1 with a single ACT-like subdomain could function better at a broader range of pH than CTD and BTD2.

ACT family domain is widely conserved in bacteria and evolutionarily mobile. It is always combined with other domains to provide easily regulated enzymes [3,16]. Most ACT domain-containing proteins have been discovered in Bacteria and Archaea, indicating that the domain appeared a long time ago [6,17,18]. CTD exists not only in bacteria, but also in plants and yeast [19,20], suggesting that the pathway of L-threonine degradation may exist in the ancestral cell before the divergence of the three kingdoms. In the primordial cell where organic compounds were rich, catabolic pathways may have been more prevalent than biosynthetic pathways, therefore, only CTD may have been required for gaining energy under anaerobic conditions [17]. With the increase of the number of primordial cells, the prebiotic supply of amino acids may have been exhausted, and thus 2-ketobutyrate produced by CTD was possibly used for L-isoleucine biosynthesis. Therefore, BTD were created by combining CTD and ACT-like subdomain to better adapt the environment [21]. The hypothesis that multiple ACT domains promote TD flexibility requires further study to confirm.

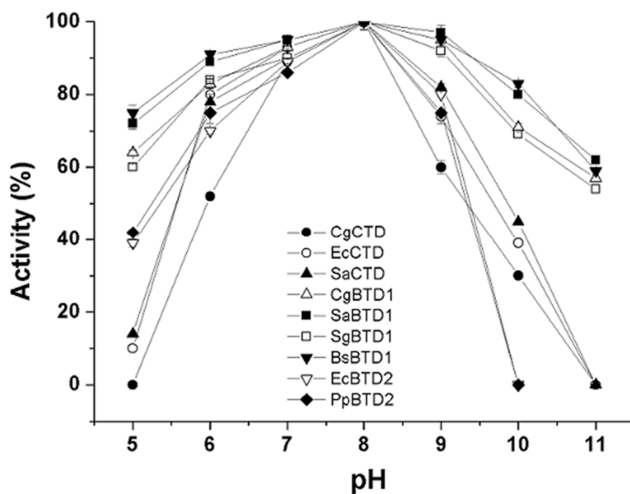

**Figure 4.** The effect of pH on the activity of nine different TDs. The remaining activities of nine TDs were measured at pH 8.0 after incubation at various pH values prior to assaying. Error bars indicate the standard deviations from three parallel samples. doi:10.1371/journal.pone.0087550.g004

## Acknowledgments

We thank the support from National Key Basic Research Program of China and National Natural Science Foundation of China.

## Author Contributions

Conceived and designed the experiments: XY XW. Performed the experiments: XY. Analyzed the data: XY YL XW. Contributed reagents/materials/analysis tools: YL XW. Wrote the paper: XY XW.

## References

1. Simanshu DK, Chittori S, Savithri HS, Murthy MR (2007) Structure and function of enzymes involved in the anaerobic degradation of L-threonine to propionate. *J Biosci* 32: 1195–1206.
2. Simanshu DK, Savithri HS, Murthy MR (2006) Crystal structures of *Salmonella typhimurium* biodegradative threonine deaminase and its complex with CMP provide structural insights into ligand-induced oligomerization and enzyme activation. *J Biol Chem* 281: 39630–39641.
3. Grant GA (2006) The ACT domain: a small molecule binding domain and its role as a common regulatory element. *J Biol Chem* 281: 33825–33829.
4. Gallagher DT, Gilliland GL, Xiao G, Zondlo J, Fisher KE, et al. (1998) Structure and control of pyridoxal phosphate dependent allosteric threonine deaminase. *Structure* 6: 465–475.
5. Shulman A, Zalyapin E, Vyazmensky M, Yifrach O, Barak Z, et al. (2008) Allosteric regulation of *Bacillus subtilis* threonine deaminase, a biosynthetic threonine deaminase with a single regulatory domain. *Biochemistry* 47: 11783–11792.
6. Han JH, Batey S, Nickson AA, Teichmann SA, Clarke J (2007) The folding and evolution of multidomain proteins. *Nat Rev Mol Cell Biol* 8: 319–330.
7. Yin L, Hu X, Xu D, Ning J, Chen J, et al. (2012) Co-expression of feedback-resistant threonine dehydratase and acetohydroxy acid synthase increase L-isoleucine production in *Corynebacterium glutamicum*. *Metab Eng* 14: 542–550.
8. Chen L, Chen Z, Zheng P, Sun J, Zeng AP (2012) Study and reengineering of the binding sites and allosteric regulation of biosynthetic threonine deaminase by isoleucine and valine in *Escherichia coli*. *Appl Microbiol Biotechnol* 97: 2939–2949.
9. Hashiguchi K, Kojima H, Sato K, Sano K (1997) Effects of an *Escherichia coli* ilvA mutant gene encoding feedback-resistant threonine deaminase on L-isoleucine production by *Brevibacterium flavum*. *Biosci Biotechnol Biochem* 61: 105–108.
10. Bradford M (1976) A rapid and sensitive method for the quantitation of microgram quantities of protein utilizing the principle of protein-dye binding. *Anal Biochem* 72: 248–254.
11. Guillouet S, Rodal AA, An G, Lessard PA, Sinskey AJ (1999) Expression of the *Escherichia coli* catabolic threonine dehydratase in *Corynebacterium glutamicum* and its effect on isoleucine production. *Appl Environ Microbiol* 65: 3100–3107.
12. Geer LY, Domrachev M, Lipman DJ, Bryant SH (2002) CDART: protein homology by domain architecture. *Genome Res* 12: 1619–1623.
13. Daniel RM, Dunn RV, Finney JL, Smith JC (2003) The role of dynamics in enzyme activity. *Annu Rev Biophys Biomol Struct* 32: 69–92.
14. Tomatis PE, Fabiane SM, Simona F, Carloni P, Sutton BJ, et al. (2008) Adaptive protein evolution grants organismal fitness by improving catalysis and flexibility. *Proc Natl Acad Sci USA* 105: 20605–20610.
15. DePristo MA, Weinreich DM, Hartl DL (2005) Missense meanderings in sequence space: a biophysical view of protein evolution. *Nat Rev Genet* 6: 678–687.
16. Chipman DM, Shaanan B (2001) The ACT domain family. *Curr Opin Struct Biol* 11: 694–700.
17. Fondi M, Emiliani G, Fani R (2009) Origin and evolution of operons and metabolic pathways. *Res Microbiol* 160: 502–512.
18. Vogel C, Bashton M, Kerrison ND, Chothia C, Teichmann SA (2004) Structure, function and evolution of multidomain proteins. *Curr Opin Struct Biol* 14: 208–216.
19. Petersen JG, Kielland-Brandt MC, Nilsson-Tillgren T, Bornaes C, Holmberg S (1988) Molecular genetics of serine and threonine catabolism in *Saccharomyces cerevisiae*. *Genetics* 119: 527–534.
20. Szamosi I, Shaner DL, Singh BK (1993) Identification and Characterization of a Biodegradative Form of Threonine Dehydratase in Senescing Tomato (*Lycopersicon esculentum*) Leaf. *Plant Physiol* 101: 999–1004.
21. Bershtein S, Tawfik DS (2008) Ohno's model revisited: measuring the frequency of potentially adaptive mutations under various mutational drifts. *Mol Biol Evol* 25: 2311–2318.
